# Supplementary material for: Retrospective comparison of approaches to evaluating inter-observer variability in CT tumour measurements in an academic health centre
Source: HighWire-hosted journal article supplement (doi:10.1136/bmjopen-2020-040096), 2020-11-01

**Supplementary 1.**

Examples of measurement for all CT image sets used in this study.

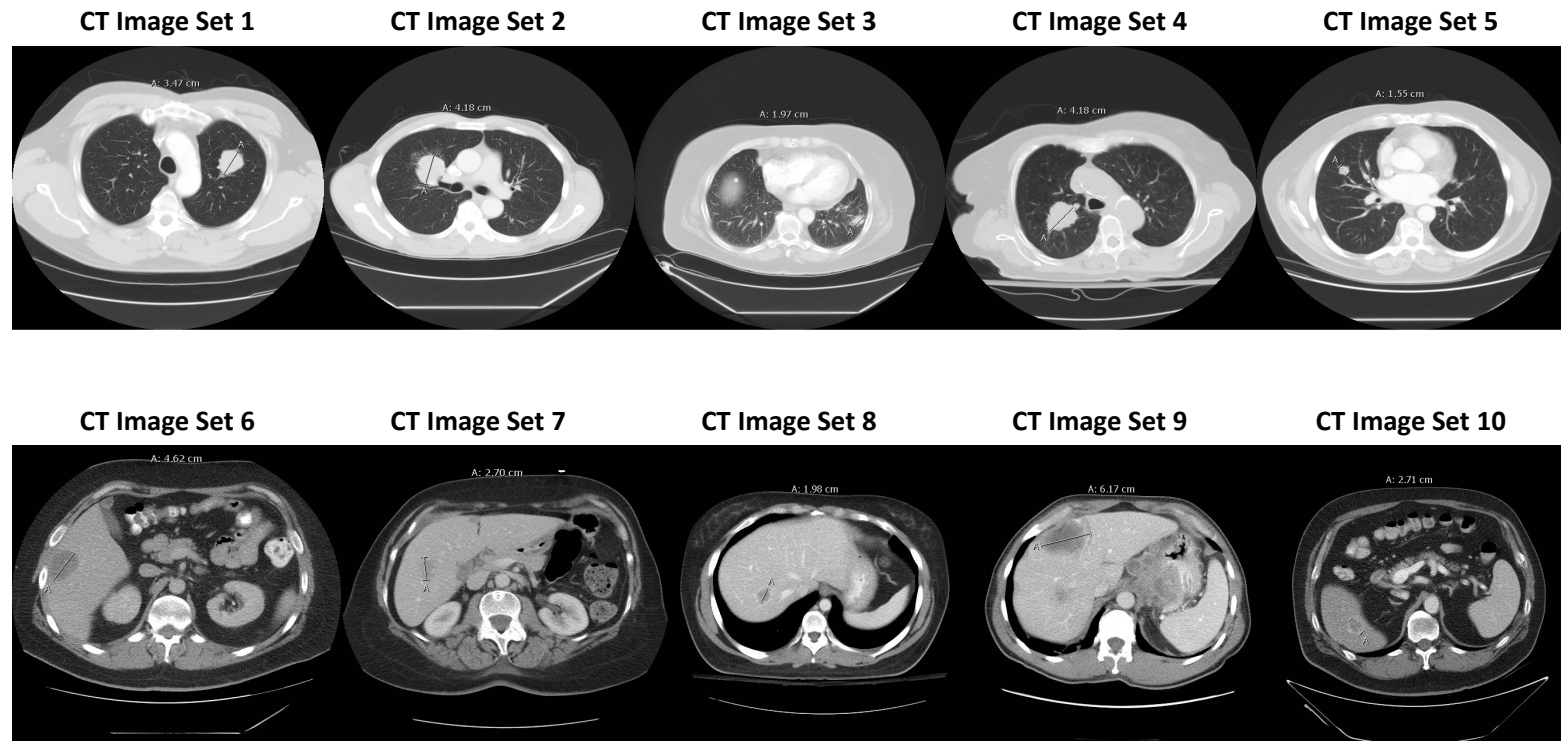

Supplement: bmjopen-2020-040096supp001_data_supplement.pdf [file bmjopen-2020-040096supp001_data_supplement.pdf]
