# Supplementary material for: Retrospective comparison of approaches to evaluating inter-observer variability in CT tumour measurements in an academic health centre
Source: HighWire-hosted journal article supplement (doi:10.1136/bmjopen-2020-040096), 2020-11-01
Supplement: bmjopen-2020-040096supp002_data_supplement.pdf [file bmjopen-2020-040096supp002_data_supplement.pdf]

## Supplementary 2.

To generate new data  $M'_{ik}$  for the  $i$ -th radiologist measurement of the  $k$ -th case representing each case, we used the following formula with a function of a scaling factor  $d$  on a percent scale:

$$M'_{ik} = \overline{M}_k + (1 + d/100)(M_{ik} - \overline{M}_k).$$

Here,  $M_{ik}$  is the observed reading of the  $i$ -th radiologist  $i$  for the  $k$ -th case, and  $\overline{M}_k$  is the median of measurements for the  $k$ -th case over all 13 radiologists. Specifically, we adjusted the inter-observer variability by assigning different values of the factor  $d$  to the deviation  $M_{ik} - \overline{M}_k$  for each radiologist. We assigned  $d = 40, 0,$  and  $-40$  so that the generated new  $M'_{ik}$  measurement data represent those with increased, observed, and decreased inter-observer variability, respectively; the deviation of each radiologist-level measurement from the case-specific mean was increased, unchanged, or decreased by  $d\%$ .

| Case with Increased Inter-observer Variability |             |      |      |      |      |      |      |      |      |      |      |      |      |
|------------------------------------------------|-------------|------|------|------|------|------|------|------|------|------|------|------|------|
| Set                                            | Radiologist |      |      |      |      |      |      |      |      |      |      |      |      |
|                                                | 1           | 2    | 3    | 4    | 5    | 6    | 7    | 8    | 9    | 10   | 11   | 12   | 13   |
| 1                                              | 5.14        | 4.20 | 3.52 | 3.71 | 4.46 | 4.06 | 4.65 | 4.19 | 4.62 | 4.23 | 4.46 | 5.45 | 4.79 |
| 2                                              | 2.87        | 2.47 | 2.79 | 2.91 | 2.23 | 2.14 | 2.52 | 3.07 | 2.80 | 3.15 | 2.35 | 2.68 | 2.55 |
| 3                                              | 2.23        | 1.84 | 1.98 | 1.91 | 1.88 | 1.64 | 1.67 | 2.38 | 2.38 | 2.12 | 1.70 | 1.98 | 1.74 |
| 4                                              | 6.86        | 5.36 | 6.14 | 6.51 | 6.51 | 4.97 | 4.90 | 5.63 | 6.06 | 6.73 | 6.66 | 6.58 | 5.75 |
| 5                                              | 3.14        | 2.27 | 2.12 | 2.57 | 2.86 | 2.46 | 2.32 | 3.30 | 2.86 | 3.07 | 2.57 | 3.37 | 2.68 |
| 6                                              | 3.46        | 3.44 | 4.13 | 3.62 | 3.40 | 3.34 | 4.10 | 3.61 | 3.06 | 3.36 | 3.99 | 3.18 | 3.61 |
| 7                                              | 4.40        | 3.95 | 4.63 | 4.01 | 3.79 | 3.86 | 4.63 | 4.18 | 3.91 | 4.21 | 4.64 | 3.81 | 4.28 |
| 8                                              | 2.03        | 2.48 | 2.06 | 1.88 | 2.03 | 1.56 | 1.89 | 1.92 | 1.56 | 2.00 | 2.07 | 2.00 | 2.07 |
| 9                                              | 4.15        | 4.29 | 4.96 | 5.19 | 4.15 | 4.01 | 4.22 | 4.36 | 3.61 | 5.47 | 4.57 | 4.26 | 4.59 |
| 10                                             | 1.70        | 1.47 | 1.12 | 1.46 | 1.35 | 1.60 | 1.60 | 1.50 | 1.56 | 1.68 | 1.50 | 1.58 | 1.68 |

| Case with Observed Inter-observer Variability |             |      |      |      |      |      |      |      |      |      |      |      |      |
|-----------------------------------------------|-------------|------|------|------|------|------|------|------|------|------|------|------|------|
| Set                                           | Radiologist |      |      |      |      |      |      |      |      |      |      |      |      |
|                                               | 1           | 2    | 3    | 4    | 5    | 6    | 7    | 8    | 9    | 10   | 11   | 12   | 13   |
| 1                                             | 4.95        | 4.28 | 3.79 | 3.93 | 4.46 | 4.18 | 4.60 | 4.27 | 4.58 | 4.30 | 4.46 | 5.17 | 4.70 |
| 2                                             | 2.82        | 2.53 | 2.76 | 2.85 | 2.36 | 2.30 | 2.57 | 2.96 | 2.77 | 3.02 | 2.45 | 2.68 | 2.59 |
| 3                                             | 2.14        | 1.86 | 1.96 | 1.91 | 1.89 | 1.72 | 1.74 | 2.25 | 2.25 | 2.06 | 1.76 | 1.96 | 1.79 |
| 4                                             | 6.65        | 5.58 | 6.14 | 6.40 | 6.40 | 5.30 | 5.25 | 5.77 | 6.08 | 6.56 | 6.51 | 6.45 | 5.86 |
| 5                                             | 3.01        | 2.39 | 2.28 | 2.60 | 2.81 | 2.52 | 2.42 | 3.12 | 2.81 | 2.96 | 2.60 | 3.17 | 2.68 |
| 6                                             | 3.46        | 3.45 | 3.94 | 3.58 | 3.42 | 3.38 | 3.92 | 3.57 | 3.18 | 3.39 | 3.84 | 3.26 | 3.57 |
| 7                                             | 4.34        | 4.02 | 4.50 | 4.06 | 3.90 | 3.95 | 4.50 | 4.18 | 3.99 | 4.20 | 4.51 | 3.92 | 4.25 |
| 8                                             | 2.02        | 2.34 | 2.04 | 1.91 | 2.02 | 1.68 | 1.92 | 1.94 | 1.68 | 2.00 | 2.05 | 2.00 | 2.05 |
| 9                                             | 4.19        | 4.29 | 4.77 | 4.93 | 4.19 | 4.09 | 4.24 | 4.34 | 3.80 | 5.13 | 4.49 | 4.27 | 4.50 |
| 10                                            | 1.66        | 1.50 | 1.25 | 1.49 | 1.41 | 1.59 | 1.59 | 1.52 | 1.56 | 1.65 | 1.52 | 1.58 | 1.65 |

| Case with Decreased Inter-observer Variability |             |      |      |      |      |      |      |      |      |      |      |      |      |
|------------------------------------------------|-------------|------|------|------|------|------|------|------|------|------|------|------|------|
| Set                                            | Radiologist |      |      |      |      |      |      |      |      |      |      |      |      |
|                                                | 1           | 2    | 3    | 4    | 5    | 6    | 7    | 8    | 9    | 10   | 11   | 12   | 13   |
| 1                                              | 4.75        | 4.35 | 4.05 | 4.14 | 4.46 | 4.29 | 4.54 | 4.34 | 4.53 | 4.36 | 4.46 | 4.88 | 4.60 |
| 2                                              | 2.76        | 2.59 | 2.72 | 2.78 | 2.48 | 2.45 | 2.61 | 2.84 | 2.73 | 2.88 | 2.54 | 2.68 | 2.62 |
| 3                                              | 2.04        | 1.88 | 1.94 | 1.91 | 1.89 | 1.79 | 1.80 | 2.11 | 2.11 | 2.00 | 1.82 | 1.94 | 1.83 |
| 4                                              | 6.45        | 5.81 | 6.14 | 6.30 | 6.30 | 5.64 | 5.61 | 5.92 | 6.11 | 6.40 | 6.37 | 6.33 | 5.98 |
| 5                                              | 2.88        | 2.51 | 2.44 | 2.63 | 2.76 | 2.58 | 2.52 | 2.94 | 2.76 | 2.85 | 2.63 | 2.97 | 2.68 |
| 6                                              | 3.46        | 3.45 | 3.74 | 3.53 | 3.43 | 3.41 | 3.73 | 3.52 | 3.29 | 3.41 | 3.68 | 3.34 | 3.52 |
| 7                                              | 4.27        | 4.08 | 4.37 | 4.11 | 4.01 | 4.04 | 4.37 | 4.18 | 4.06 | 4.19 | 4.38 | 4.02 | 4.22 |
| 8                                              | 2.02        | 2.21 | 2.03 | 1.95 | 2.02 | 1.81 | 1.96 | 1.97 | 1.81 | 2.00 | 2.03 | 2.00 | 2.03 |
| 9                                              | 4.23        | 4.29 | 4.58 | 4.68 | 4.23 | 4.17 | 4.26 | 4.32 | 4.00 | 4.80 | 4.41 | 4.28 | 4.42 |
| 10                                             | 1.62        | 1.52 | 1.37 | 1.51 | 1.47 | 1.57 | 1.57 | 1.53 | 1.56 | 1.61 | 1.53 | 1.57 | 1.61 |
